# Supplementary material
Source: publisher figshare collection journal article supplement (https://karger.figshare.com/ndownloader/files/26062601)
Supplement: Supplementary file 1 [file 26062601]

**Supplementary appendix**

Table S4. Sensitivity analyses for in-hospital mortality in included studies

| **Study removed** | **No. of Patients** | **RR (95% CI)** | ***P* value** | ***I2*(%)** |
| --- | --- | --- | --- | --- |
| Andreassen et al., 2014 | 22625 | 2.64 (1.86-3.76) | <0.00001 | 79 |
| Boixeda et al., 2014 | 23210 | 2.43 (1.71-3.44) | <0.00001 | 81 |
| Huerta et al., 2013 | 23085 | 2.52 (1.78-3.58) | <0.00001 | 80 |
| Jeong et al., 2010 | 23143 | 2.47 (1.73-3.53) | <0.00001 | 81 |
| Kim et al., 2016 | 22857 | 2.31 (1.64-3.25) | <0.00001 | 80 |
| Lieberman et al., 2002 | 23094 | 2.29 (1.64-3.20) | <0.00001 | 79 |
| Lu et al., 2016 | 23254 | 2.46 (1.71-3.55) | <0.00001 | 81 |
| Myint et al., 2011 | 13996 | 2.70 (2.00-3.65) | <0.00001 | 41 |
| Sharafkhaneh et al., 2017 | 12702 | 2.41 (1.58-3.70) | <0.0001 | 68 |
| Shin et al., 2016 | 22960 | 2.34 (1.65-3.32) | <0.00001 | 80 |
| Steer et al., 2012 | 22414 | 2.28 (1.57-3.32) | <0.0001 | 79 |

RR, relative risk; CI, confidence interval.
